# Supplementary material
Source: PubMed Central journal article supplement (PMC6999703)
Supplement: NIHMS1067656-supplement-suppl.pdf [file NIHMS1067656-supplement-suppl.pdf]

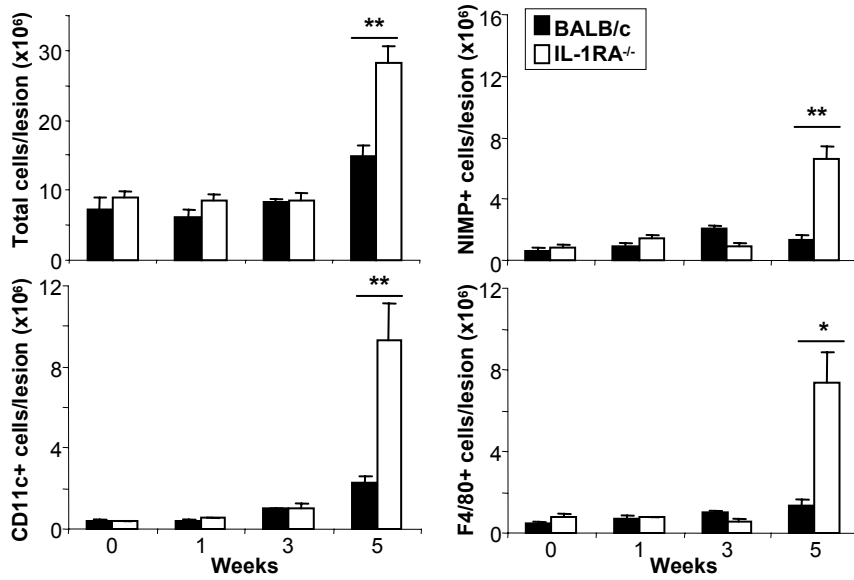

**Figure S1: Lesions of IL-1RA<sup>-/-</sup> BALB/c mice contain higher numbers of neutrophils, DC and macrophages.**

After infection with  $10^3$  *L. major* metacyclic parasites, lesions were harvested at different time points as indicated and the numbers of NIMP-R14<sup>+</sup> neutrophils, CD11c<sup>+</sup> DC, and F4/80<sup>+</sup> MΦ were determined using flow cytometry (mean±SEM, n≥10 mice/group, \*=p≤0.05 and \*\*=p≤0.005).

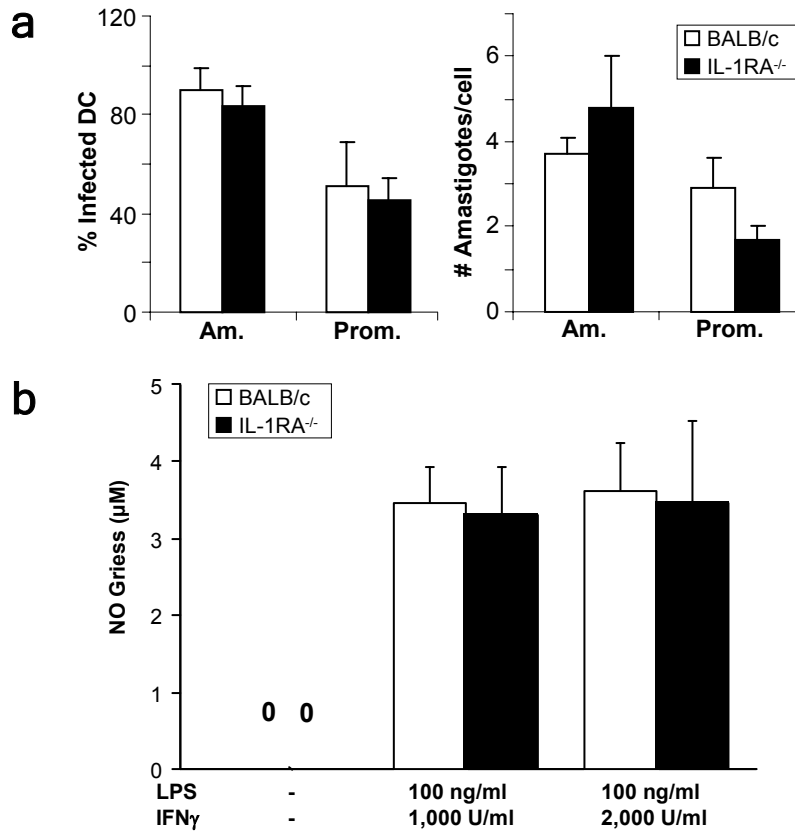

**Figure S2: M $\Phi$  of BALB/c and IL-1RA<sup>-/-</sup> mice produce the same amounts of NO.** Skin-derived M $\Phi$  were plated at  $2 \times 10^5$ /ml and **A**, co-incubated with *L. major* amastigotes or metacyclic promastigotes at 1 cell/3 parasites. After 18 hrs, infection rates were determined on DiffQuick-stained cytopspins (n=4). **B**, M $\Phi$  were incubated for 48 h with LPS/IFN $\gamma$ . Supernatants were collected and analyzed with Griess reagent for nitrite production (n=2). **A+B**, data are presented as mean $\pm$ SEM.
